# Supplementary material for: Urinary Melatonin in Relation to Breast Cancer Risk: Nested Case–Control Analysis in the DOM Study and Meta-analysis of Prospective Studies
Source: Oxford University Press journal article supplement (doi:10.1158/1055-9965.epi-20-0822), 2020-11-03
Supplement: 10559965epi200822-sup-244267_2_supp_6618848_qhj55w.docx [file 10559965epi200822-sup-244267_2_supp_6618848_qhj55w.docx]

Supplementary Table S1. Search terms used for the meta-analysis of prospective studies of urinary melatonin in relation to breast cancer risk

**Embase**

1. breast cancer.mp. or breast cancer/

2. breast carcinoma.mp. or breast carcinoma/

3. breast tumor.mp. or breast tumor/

4. breast neoplasm.mp. or breast tumor/

5. melatonin.mp. or melatonin/

6. (6-sulfatoxymelatonin or 6-sulphatoxymelatonin).mp. [mp=title, abstract, heading word, drug trade name, original title, device manufacturer, drug manufacturer, device trade name, keyword, floating subheading word, candidate term word]

7. 5 or 6

8. 1 or 2 or 3 or 4

9. 7 and 8

10. (prospective or nested case-control).mp. [mp=title, abstract, heading word, drug trade name, original title, device manufacturer, drug manufacturer, device trade name, keyword, floating subheading word, candidate term word]

11. 9 and 10

12. limit 11 to English language

**MEDLINE**

1. breast cancer.mp. or Breast Neoplasms/

2. breast carcinoma.mp. or Breast Neoplasms/

3. breast tumor.mp. or Breast Neoplasms/

4. breast neoplasm.mp. or Breast Neoplasms/

5. melatonin.mp. or Melatonin/

6. (6-sulfatoxymelatonin or 6-sulphatoxymelatonin).mp. [mp=title, abstract, original title, name of substance word, subject heading word, floating sub-heading word, keyword heading word, organism supplementary concept word, protocol supplementary concept word, rare disease supplementary concept word, unique identifier, synonyms]

7. 5 or 6

8. 1 or 2 or 3 or 4

9. 7 and 8

10. (prospective or nested case-control).mp. [mp=title, abstract, original title, name of substance word, subject heading word, floating sub-heading word, keyword heading word, organism supplementary concept word, protocol supplementary concept word, rare disease supplementary concept word, unique identifier, synonyms]

11. 9 and 10

12. limit 11 to English language
